# Supplementary material
Source: PubMed Central journal article supplement (PMC3875388)
Supplement: NIHMS537945-supplement-01.pdf [file NIHMS537945-supplement-01.pdf]

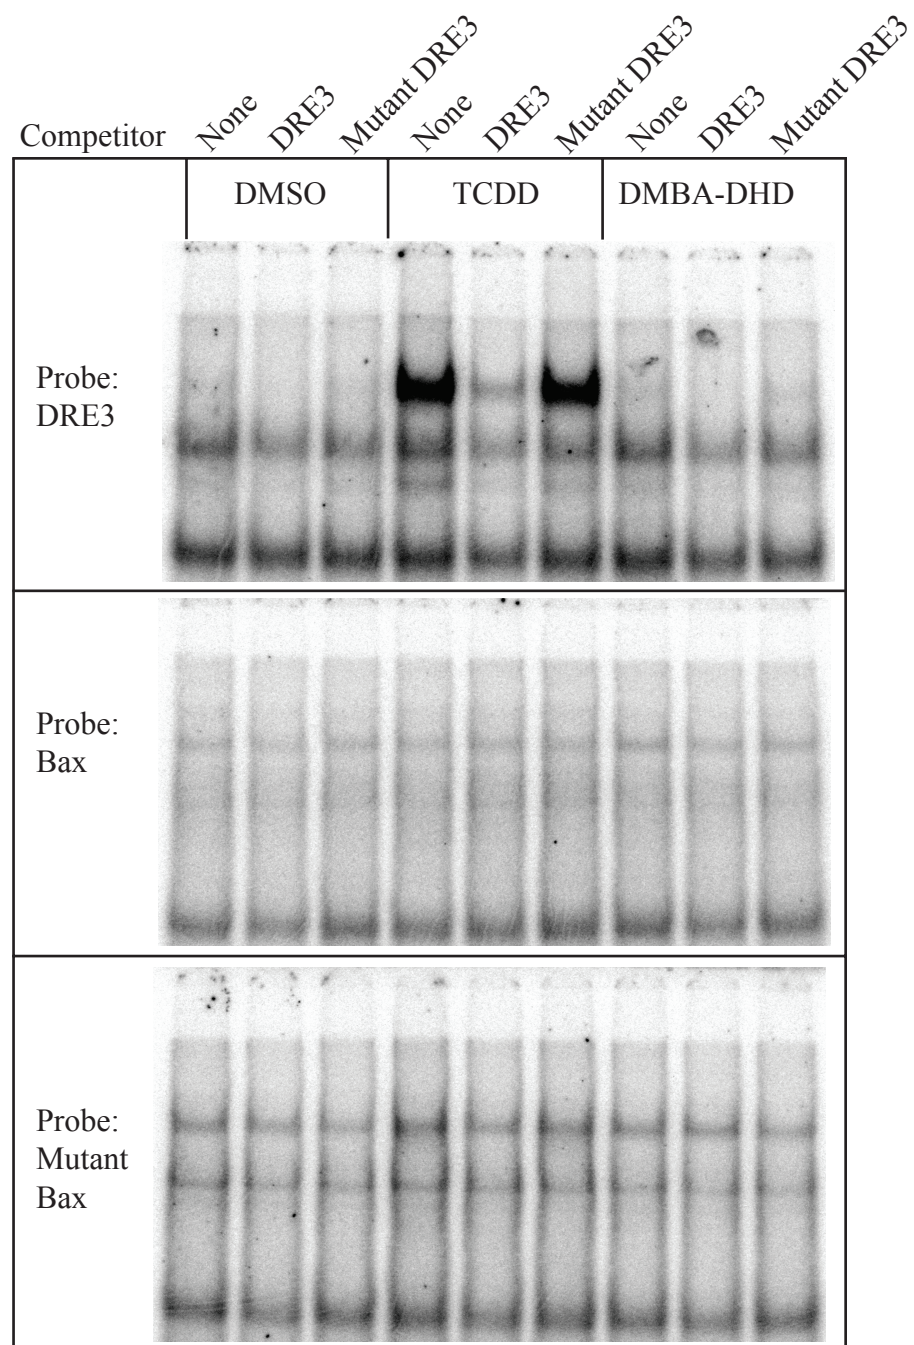

**Supplemental Figure 1: Competitive EMSA experiments fail to identify any AhR:ARNT:Bax DNA or AhR:ARNT:mutant Bax-DNA complexes.**

Nuclear extracts and EMSA analysis were as previously described (Figure 3). Where indicated, a 15-fold molar excess of unlabeled DRE3 or mutant DRE3 oligomer (does not bind AhR:ARNT complex) was included in the AhR:ARNT:probe incubation.
